# Supplementary material for: Highly thermally conductive liquid metal-based composites with superior thermostability for thermal management
Source: Royal Society of Chemistry journal article supplement (doi:10.1039/d0tc05493c), 2021-01-01
Supplement: d0tc05493c1.pdf [file d0tc05493c1.pdf]

## **Electronic Supplementary Information**

### **Highly Thermally Conductive Liquid Metal-based Composites with Superior Thermostability for Thermal Management**

Li-Chuan Jia,<sup>a</sup> Yi-Fei Jin,<sup>a</sup> Jun-Wen Ren,<sup>\*a</sup> Li-Hua Zhao,<sup>a</sup> Ding-Xiang Yan,<sup>\*b</sup> and  
Zhong-Ming Li<sup>b</sup>

*<sup>a</sup>College of Electrical Engineering, Sichuan University, Chengdu 610065, China.*

*myboyryl@scu.edu.cn*

*<sup>b</sup>College of Polymer Science and Engineering, State Key Laboratory of Polymer  
Materials Engineering, Sichuan University, Chengdu 610065, China.*

*yandingxiang@scu.edu.cn*

## 1. The size distribution of ANFs and LM droplets

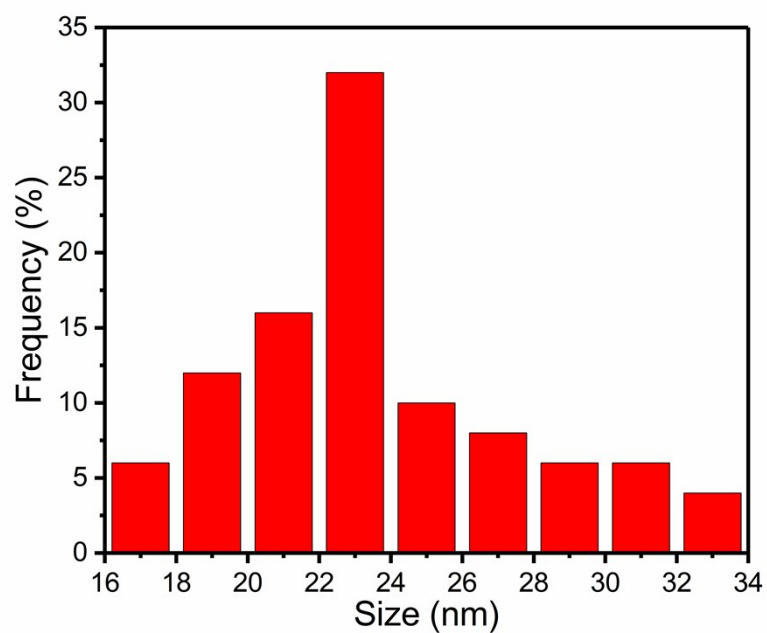

**Fig. S1** The size distribution of ANFs.

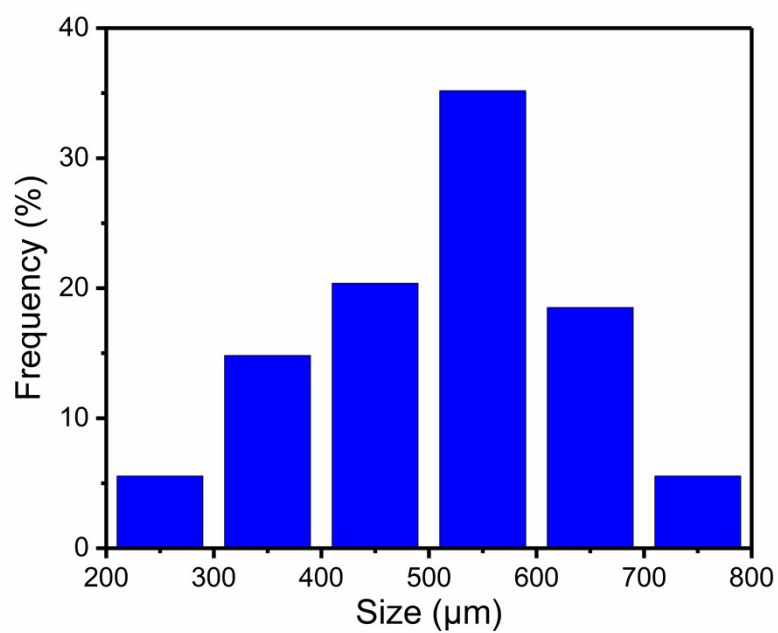

**Fig. S2** The size distribution of LM droplets.

## 2. The fracture morphology of pure ANF film

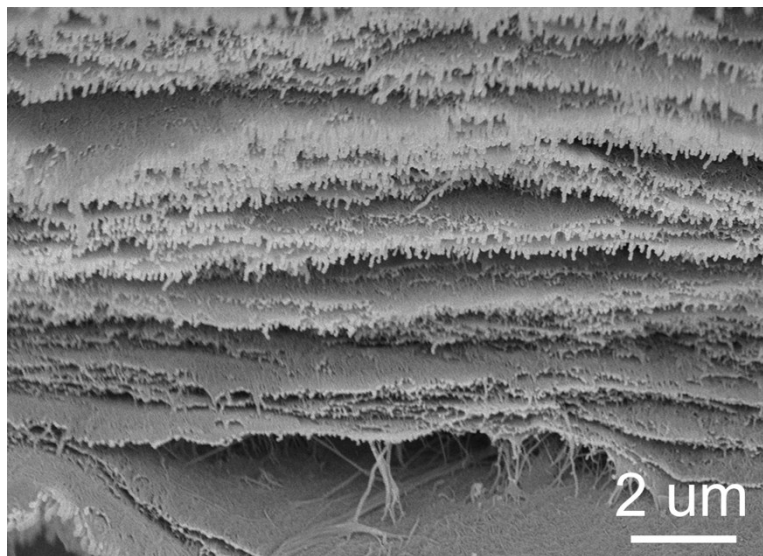

**Fig. S3** SEM image of pure ANF film.

## 3. The fracture morphology of the 20 vol% LM/ANF composite film

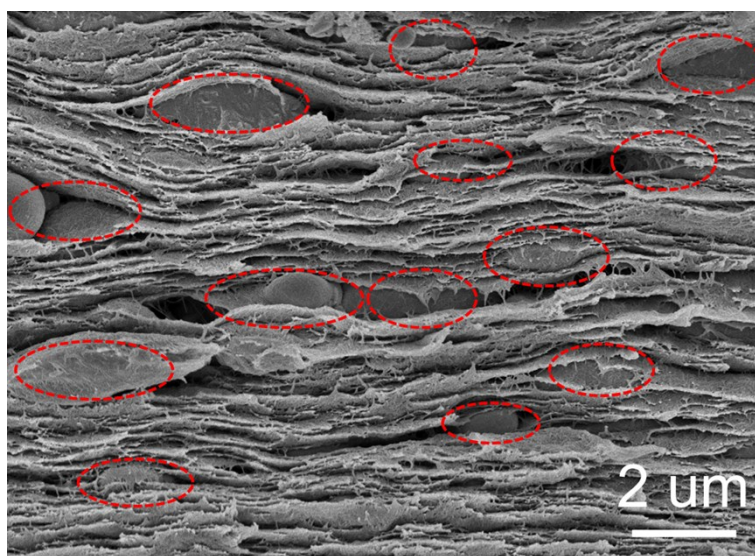

**Fig. S4** SEM image of the LM/ANF composite film at 20 vol% LM content.

#### 4. The evaluation of in-plane heat conduction for the specimens

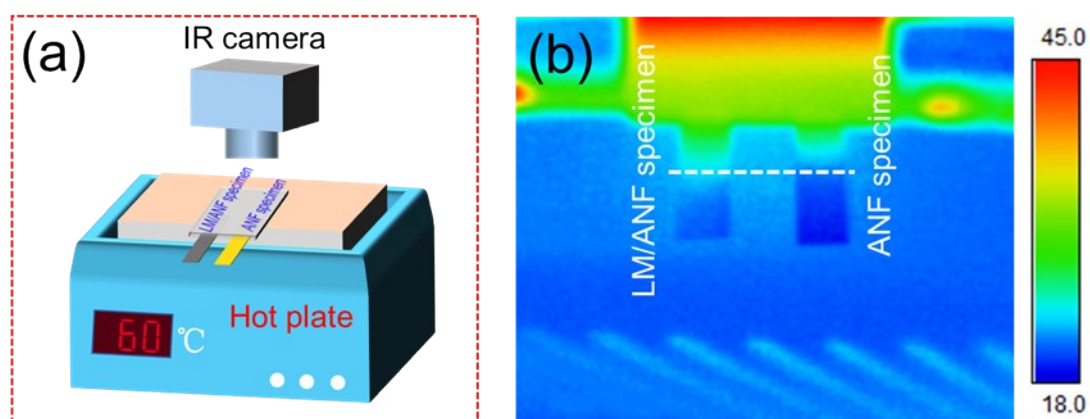

**Fig. S5** (a) The schematic diagram for the testing apparatus on the actual performance of in-plane heat conduction for the 40 vol% LM/ANF composite film and pure ANF film specimens. (b) the corresponding thermography of the specimens.

#### 5. Comparison of the thermal conductivity of the LM/ANF composite films with other LM based TCPCs

**Table S1** Thermal conductivity of the LM/ANF composite films compared with the other reported LM based TCPCs in the literature.

| Matrix               | Filler    | Filler content (vol%) | Through-plane TC ( $\text{W m}^{-1} \text{K}^{-1}$ ) | Reference        |
|----------------------|-----------|-----------------------|------------------------------------------------------|------------------|
| <b>ANF</b>           | <b>LM</b> | <b>40</b>             | <b>1.68</b>                                          | <b>This work</b> |
| SE <sup>a)</sup>     | LM        | 50                    | 1.30                                                 | 1                |
| PDMS <sup>a)</sup>   | LM        | 66.1                  | 2.20                                                 | 2                |
| CNC/PV <sup>a)</sup> | LM        | ~                     | 0.53                                                 | 3                |
| SE <sup>a)</sup>     | LM        | 80                    | 6.7                                                  | 4                |
| PDMS <sup>a)</sup>   | LM        | 50                    | 1.50                                                 | 5                |

SE, PDMS, CNC, and PVA represent silicone elastomer, PDMS(polydimethylsiloxane), poly(vinyl alcohol), and cellulose nanofiber, respectively.

**6. The tensile fracture morphology of the 20 vol% LM/ANF composite film**

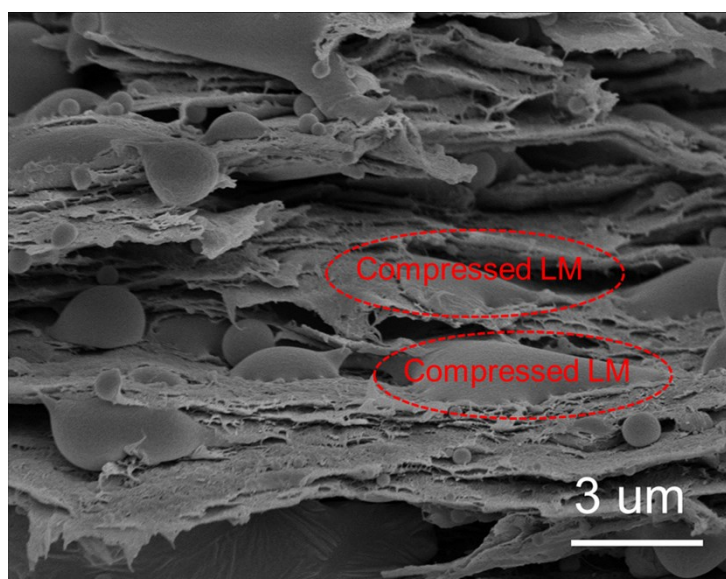

**Fig. S6** The tensile fracture morphology of the 20 vol% LM/ANF composite film.

**7. The dynamical changes of the LM and rigid filler based ANF composites during the stretching process**

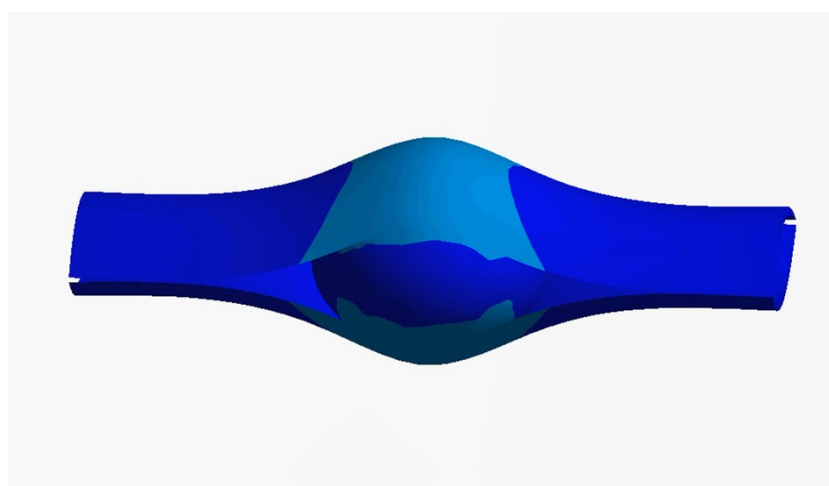

**Video S1** The dynamical changes of the LM based ANF composites during the stretching process.

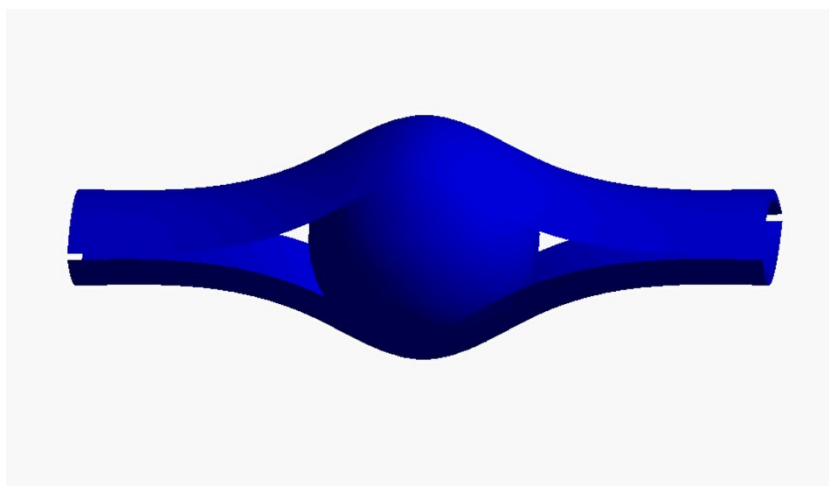

**Video S2** The dynamical changes of the rigid filler based ANF composites based ANF composites during the stretching process.

## References

- 1 M.D. Bartlett, N. Kazem, M.J. Powell-Palm, X. Huang, W. Sun, J.A. Malen and C. Majidi, *P. Natl. Acad. Sci.*, 2017, **114**, 2143.
- 2 S.H. Jeong, S. Chen, J. Huo, E.K. Gamstedt, J. Liu, S.L. Zhang, Z.B. Zhang, K. Hjort and Z. Wu, *Sci. Rep.*, 2015, **5**, 18257.
- 3 P. Zhang, Q. Wang, R. Guo, M. Zhang, S. Wang, C. Lu, M. Xue, J. Fan, Z. He, and W. Rao, *Mater. Hor.*, 2019, **6**, 1643.
- 4 R. Tutika, S.H. Zhou, R.E. Napolitano, and M.D. Bartlett, *Adv. Funct. Mater.*, 2018, **28**, 1804336.
- 5 M.I. Ralphs, N. Kemme, P.B. Vartak, E. Joseph, S. Tipnis, S. Turnage, K.N. Solanki, R.Y. Wang, and K. Rykaczewski, *ACS Appl. Mater. Interfaces* 2018, **10**, 2083.
